# Supplementary material for: Syntheses of Au–Cu-rich AuAg(AgCl)Cu alloy and Ag–Cu-rich AuAgCu@Cu core–shell and AuAgCu alloy nanoparticles using a polyol method
Source: Royal Society of Chemistry journal article supplement (doi:10.1039/c2ce06119h), 2012-01-01
Supplement: c2ce06119h.pdf [file c2ce06119h.pdf]

## Supplementary Information

### **Syntheses of Au–Cu-rich AuAg(AgCl)Cu alloy and Ag–Cu-rich AuAgCu@Cu core–shell and AuAgCu alloy nanoparticles using polyol method**

Masaharu Tsuji,<sup>\*a,b</sup> Mika Matsunaga,<sup>a</sup> Toshitaka Ishizaki<sup>c</sup> and Takamasa Nonaka<sup>c</sup>

<sup>a</sup> *Institute for Materials Chemistry and Engineering, Kyushu University, Kasuga 816-8580,*

<sup>b</sup> *Department of Applied Science for Electronics and Materials, Graduate School of Engineering Sciences, Kyushu University, Kasuga 816-8580, Japan*

<sup>c</sup> *Toyota Central R & D Labs., Inc., Nagakute, Aichi, 480-1192, Japan*

*\*To whom correspondence should be addressed: E-mail: [tsuji@cm.kyushu-u.ac.jp](mailto:tsuji@cm.kyushu-u.ac.jp)*

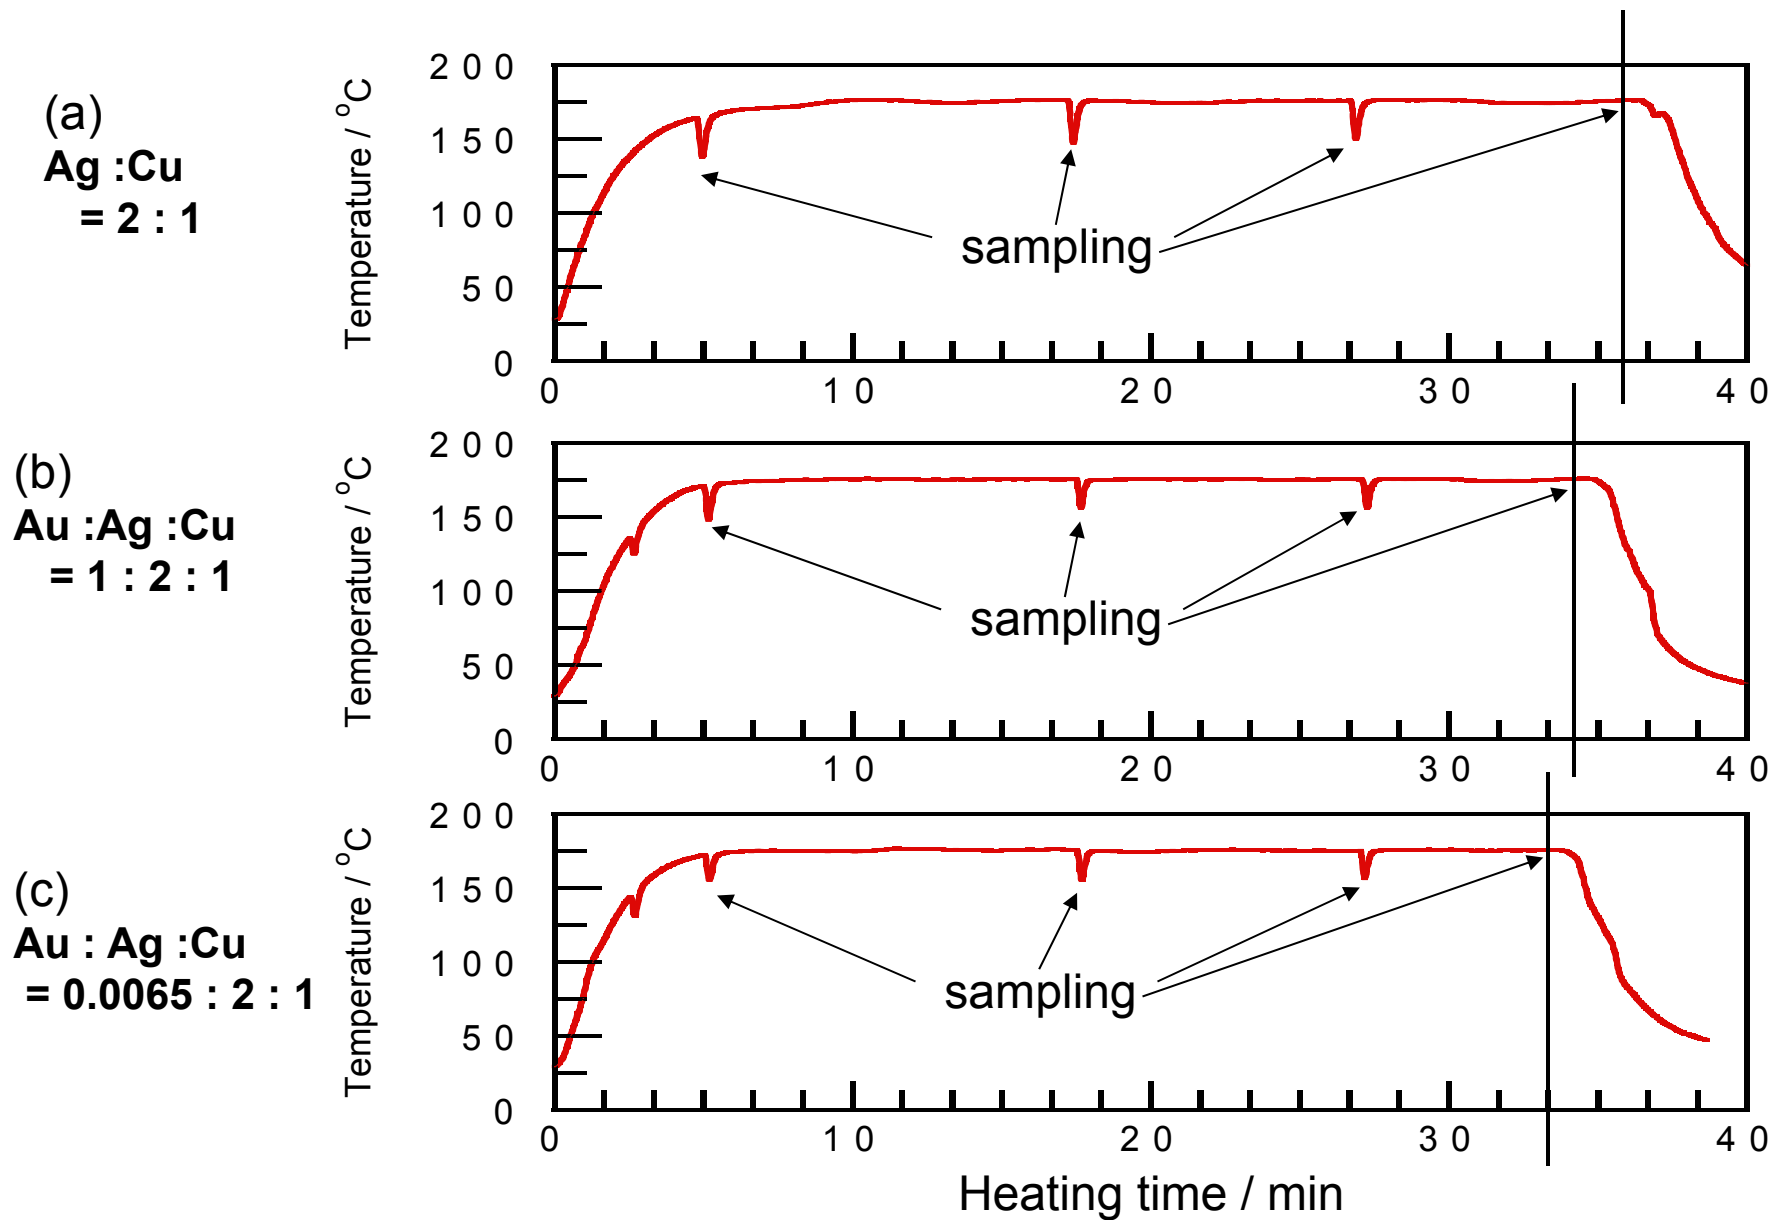

**Fig. S1.** Temperature profiles in each experiment.

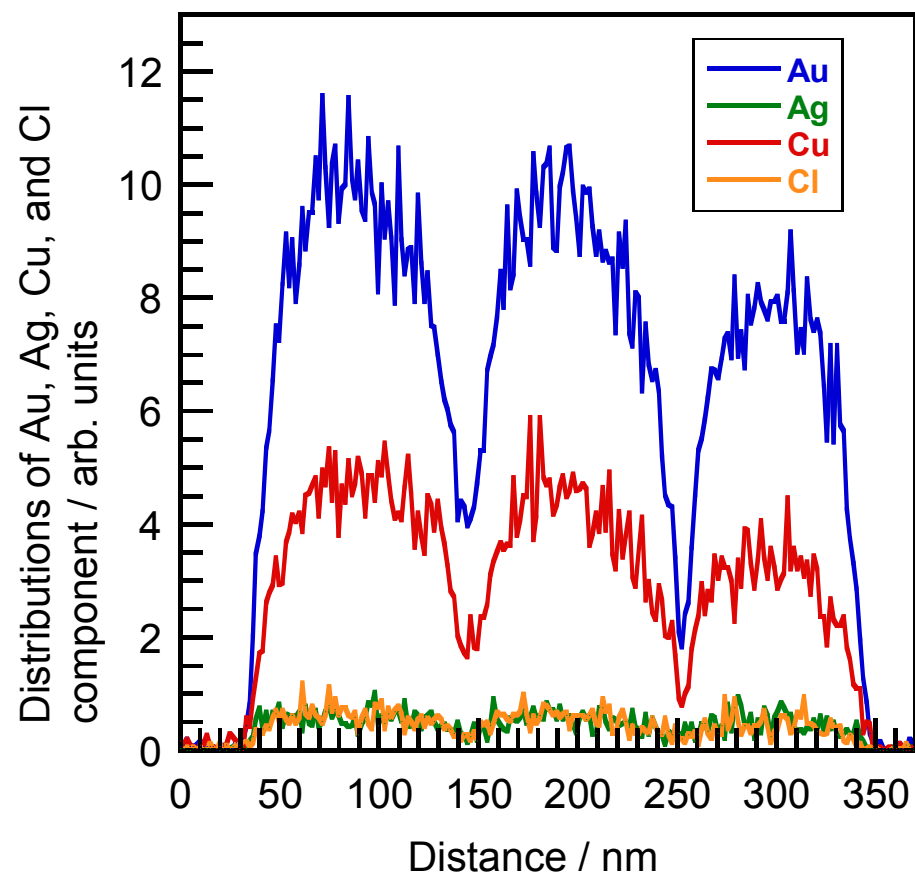

**Fig. S2.** Line analysis data of Au, Ag, Cu, and Cl components along a line shown in Fig. 2c.

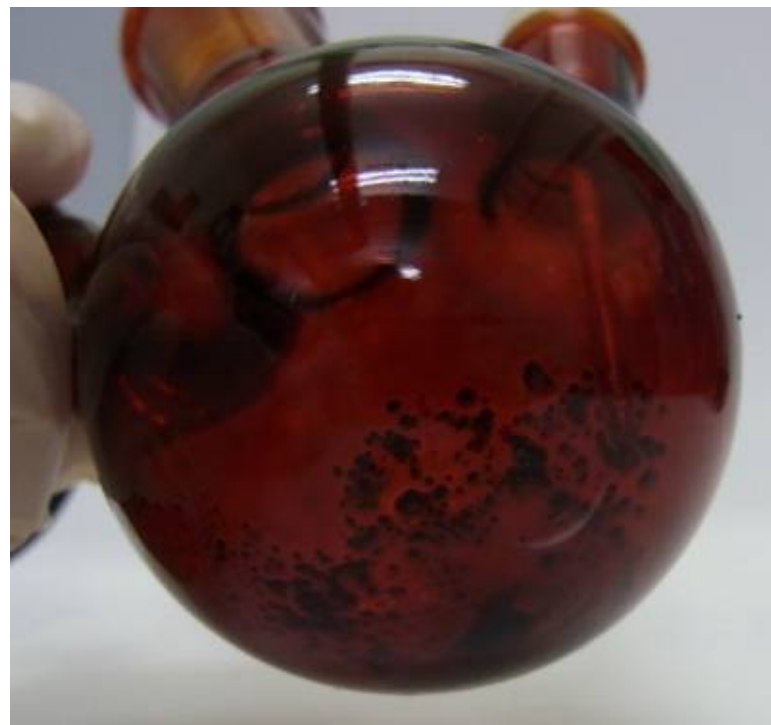

**Fig. S3.** Precipitate deposited on the bottom of flask.

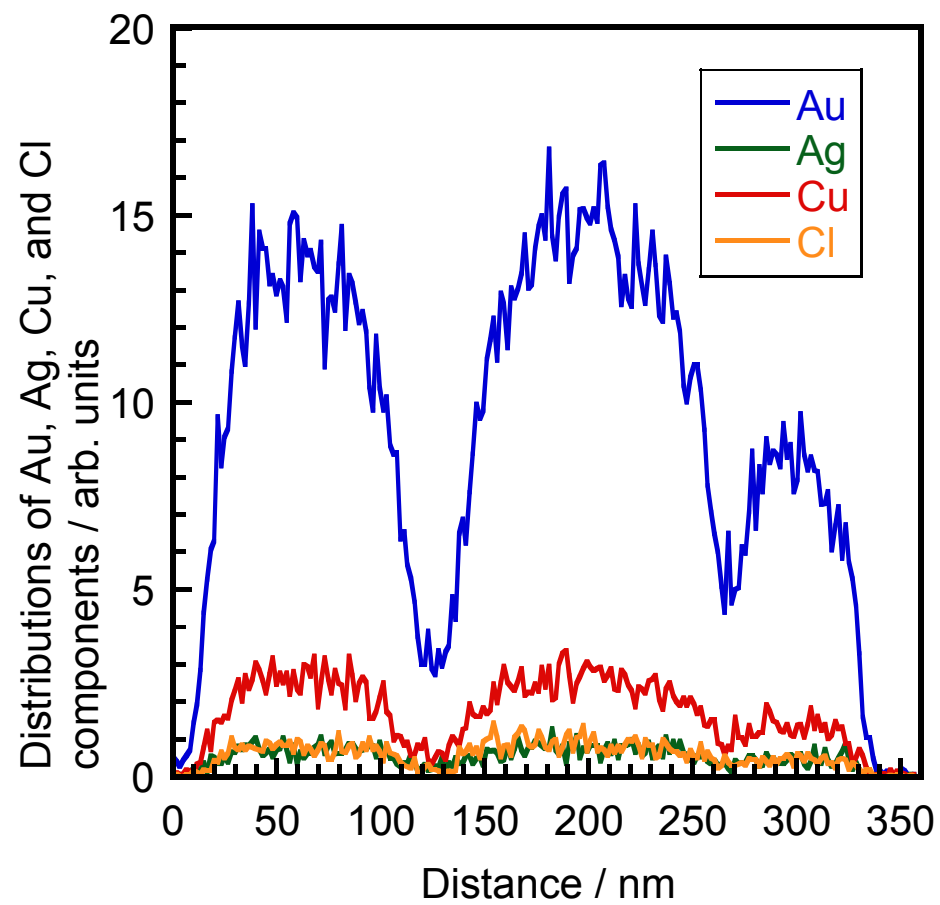

**Fig. S4.** Line analysis data along a blue line in Fig. 2f.

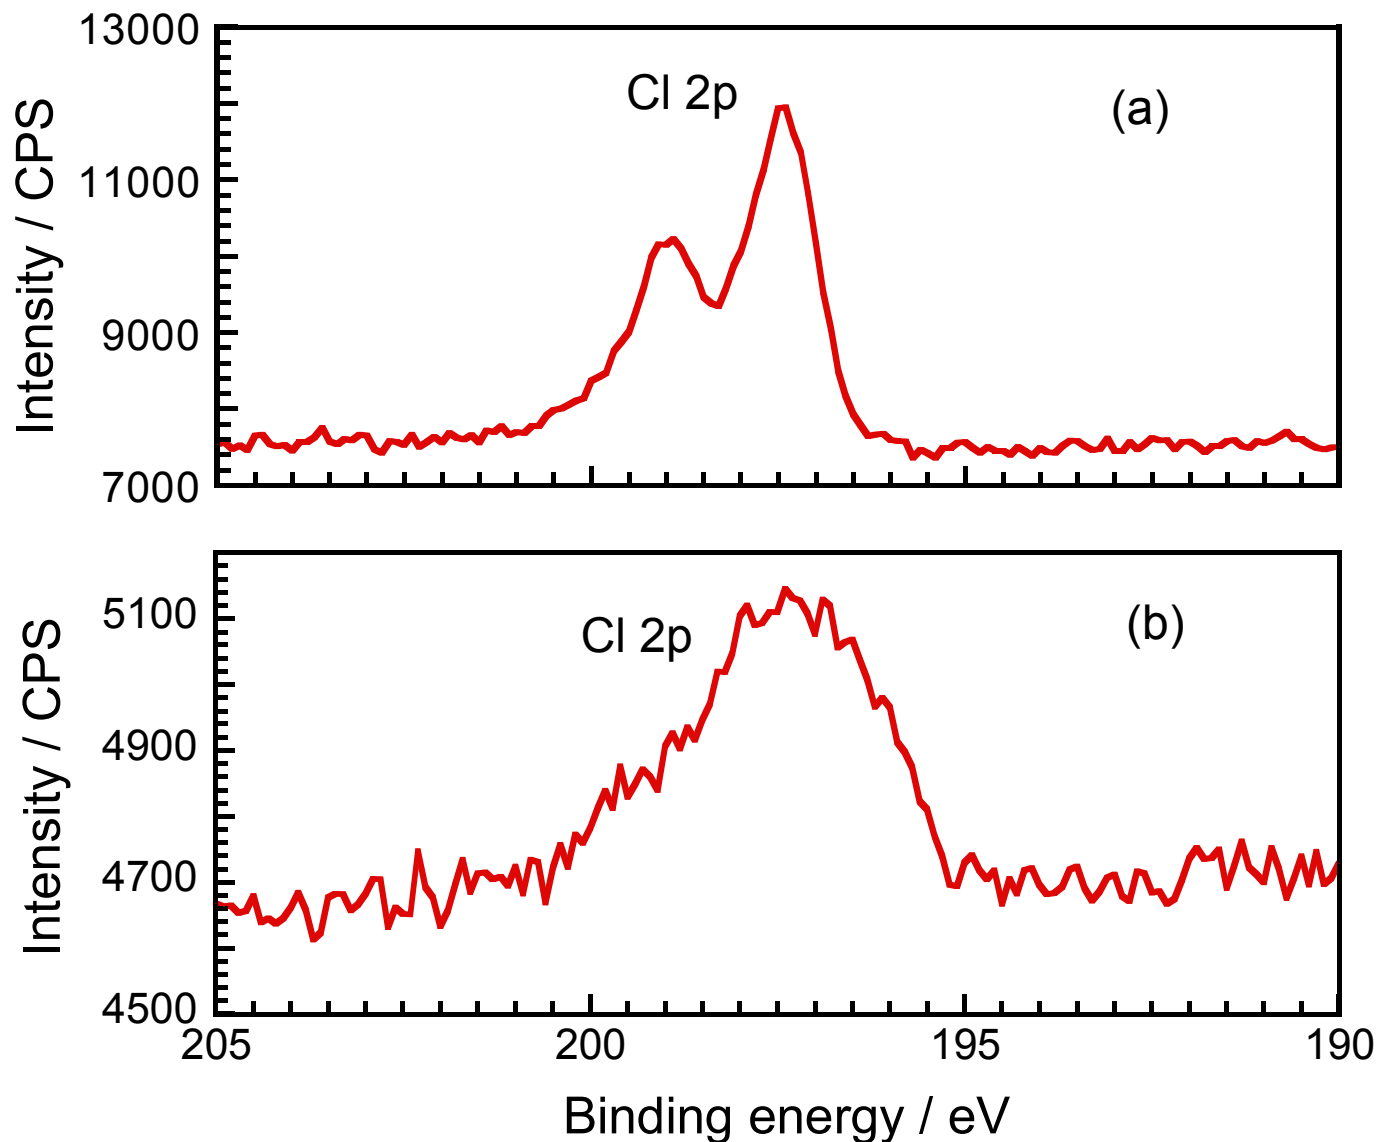

**Fig. S5.** XPS spectra of Cl 2p component of AuAg(AgCl)Cu particles prepared from  $\text{HAuCl}_4 \cdot \text{H}_2\text{O} / \text{AgNO}_3 / \text{Cu}(\text{OAc})_2 \cdot \text{H}_2\text{O} / \text{PVP}$  mixtures in EG at a Au : Ag : Cu molar ratio of 1 : 2 : 1. (a) before and (b) after saturated NaCl treatment for AgCl removal.

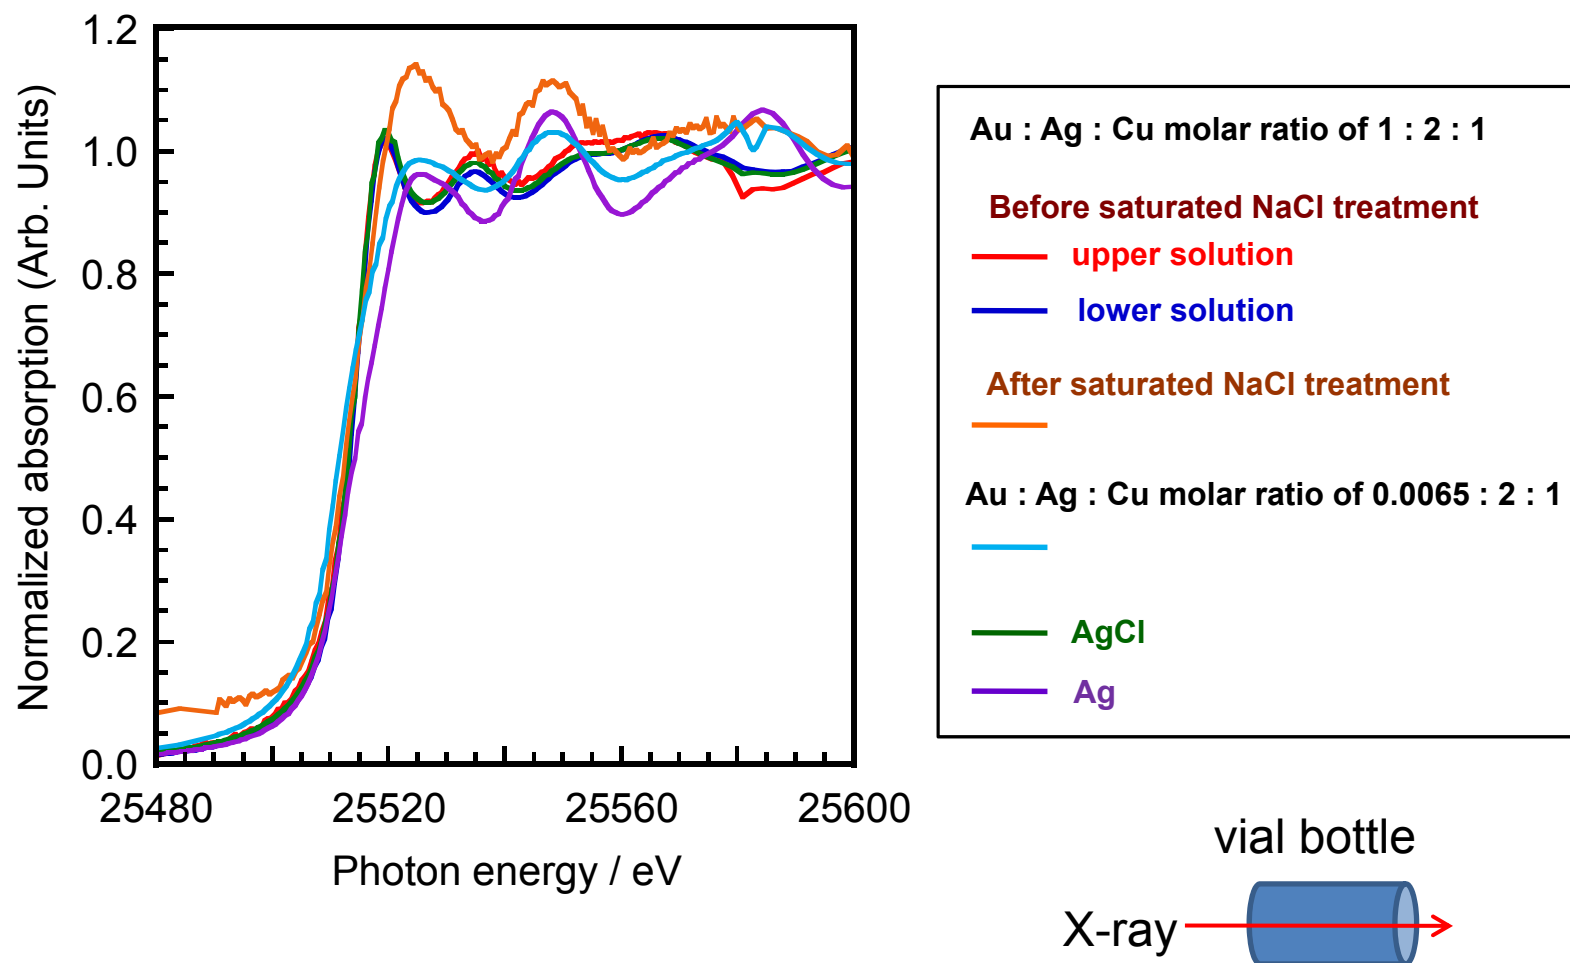

**Fig. S6.** Ag K-edge XANES spectra of AuAg(AgCl)Cu particles prepared from  $\text{HAuCl}_4 \cdot \text{H}_2\text{O}/\text{AgNO}_3/\text{Cu}(\text{OAc})_2 \cdot \text{H}_2\text{O}/\text{PVP}$  mixtures in EG at a Au : Ag : Cu molar ratios of 1 : 2 : 1 before and after saturated NaCl treatment and 0.0065 : 2 : 1. For comparison XANES spectra of AgCl and Ag are shown.

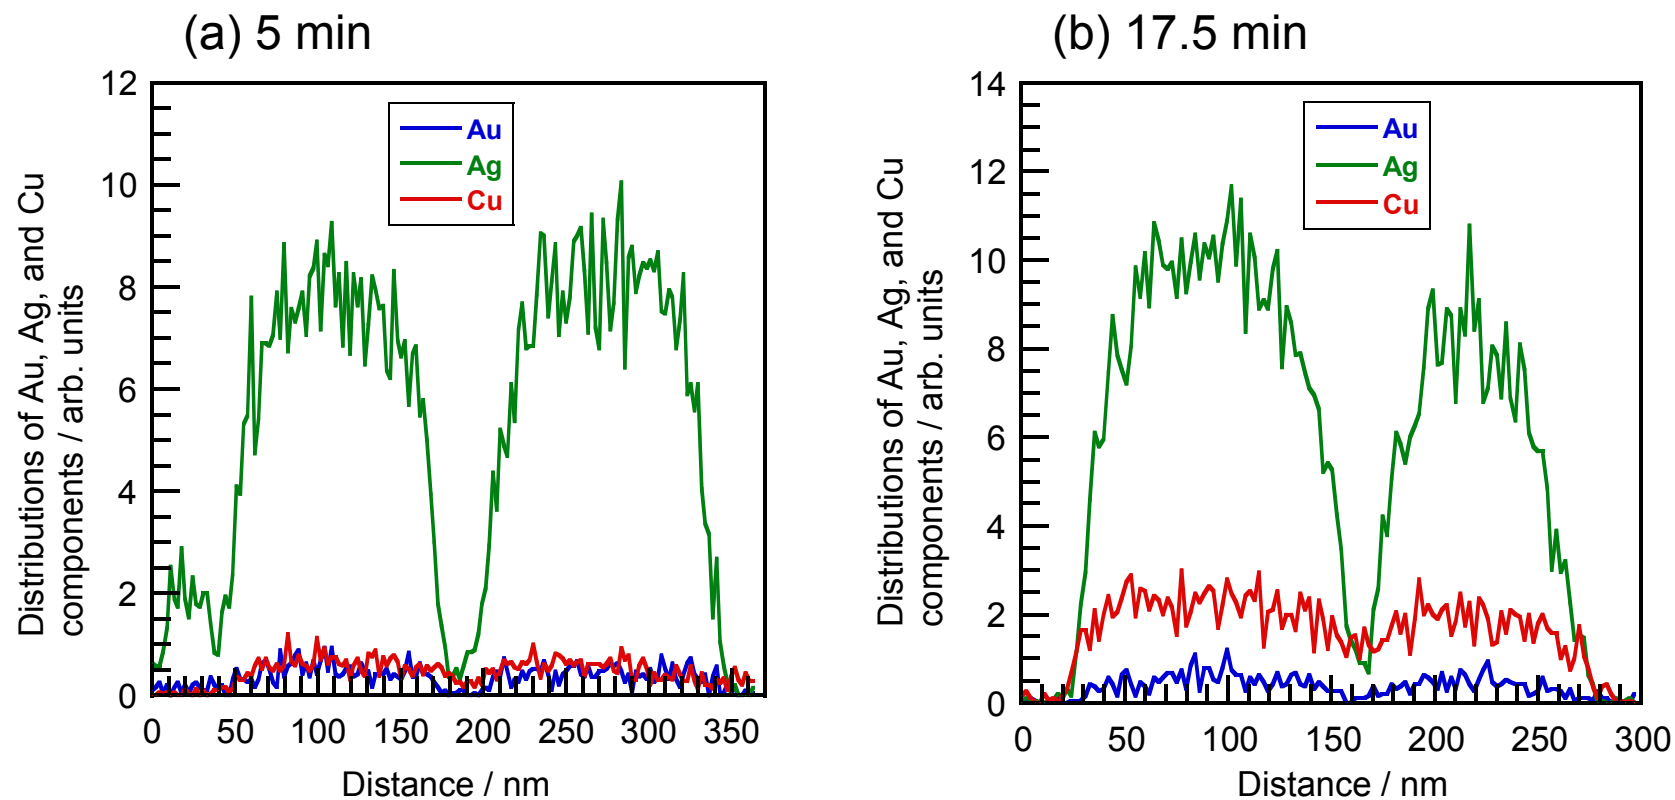

**Fig. S7.** Line analysis data of Au, Ag, and Cu components along blue lines shown in Fig. 5b and Fig. 5c.



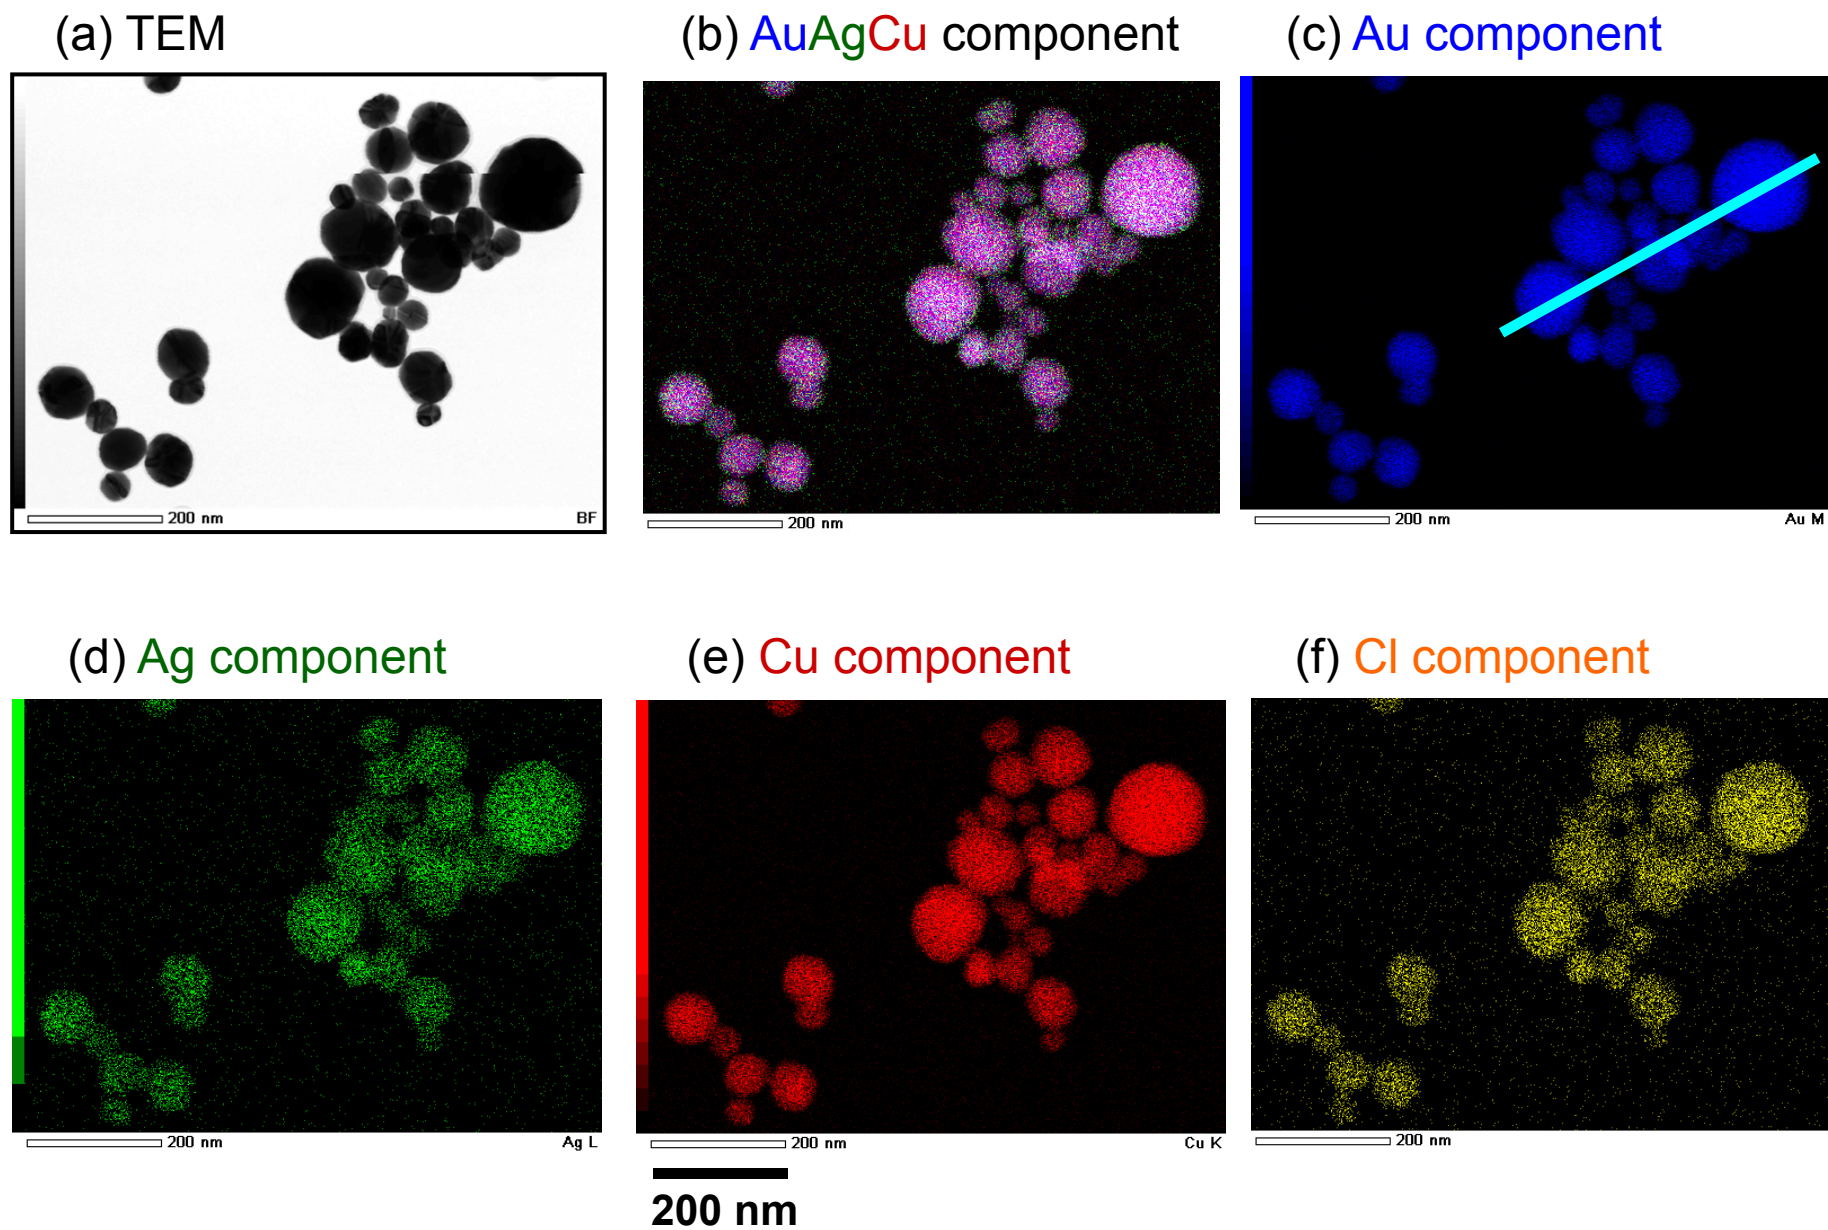

**Fig. S8.** TEM and TEM-EDS data of Au, Ag, Cu, and Cl components of AuAg(AgCl)Cu alloy particles.

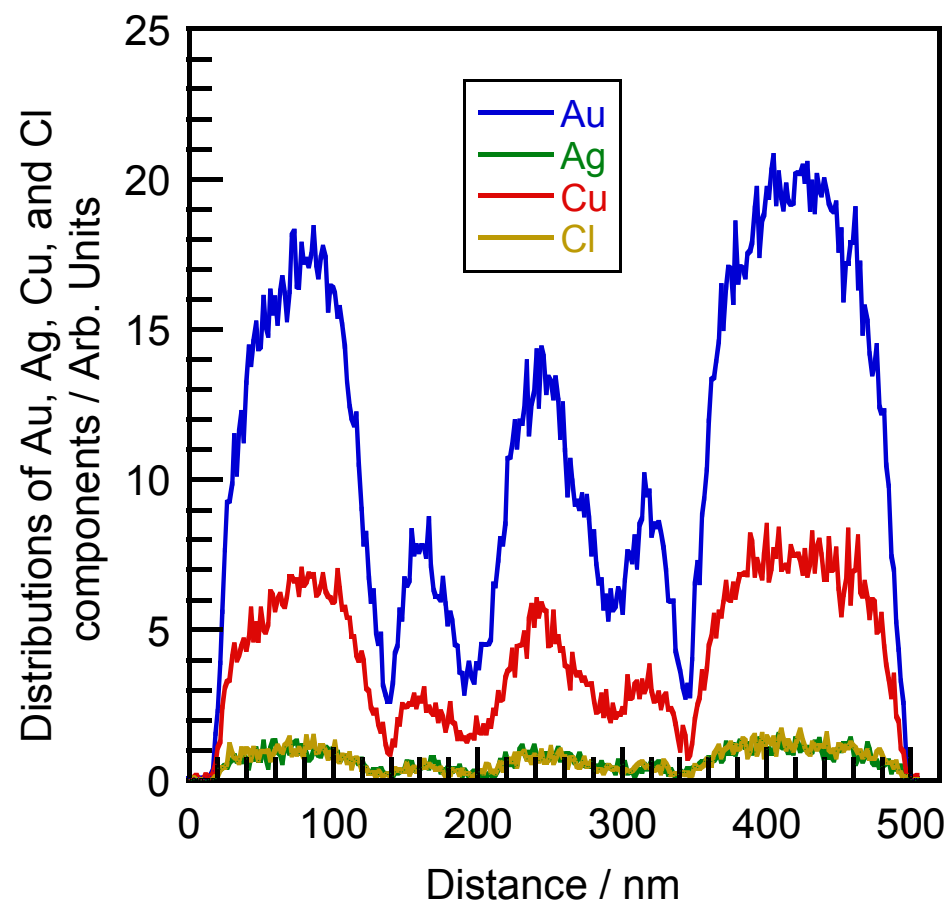

**Fig. S9.** Line analysis data along a blue line in Fig. S8c.
